# Supplementary material for: Potential Antioxidative and Anti-Hyperuricemic Components Targeting Superoxide Dismutase and Xanthine Oxidase Explored from Polygonatum Sibiricum Red.
Source: MDPI journal article supplement (doi:10.3390/antiox11091651), 2022-08-25
Supplement: s1 [file s1]

## Supplementary materials

# Potential Antioxidative and Anti-Hyperuricemic Components Targeting Superoxide Dismutase and Xanthine Oxidase Explored from *Polygonatum Sibiricum* Red.

Jing Li <sup>1,2,†</sup>, Zhi Wang <sup>3,†</sup>, Minxia Fan <sup>1,4,5</sup>, Guangwan Hu <sup>1,2,4,5,\*</sup>, and Mingquan Guo <sup>1,2,4,5,\*</sup>

<sup>1</sup> Key Laboratory of Plant Germplasm Enhancement and Specialty Agriculture, Wuhan Botanical Garden, Chinese Academy of Sciences, Wuhan 430074, China

<sup>2</sup> College of Life Sciences, University of Chinese Academy of Sciences, Beijing 100049, China

<sup>3</sup> College of Pharmacy, Hunan University of Chinese Medicine, Changsha 410208, China

<sup>4</sup> Sino-Africa Joint Research Center, Chinese Academy of Sciences, Wuhan 430074, China

<sup>5</sup> Innovation Academy for Drug Discovery and Development, Chinese Academy of Sciences, Shanghai 201203, China

\* Correspondence: guangwanhu@wbcas.cn (G.H.); guomq@wbcas.cn (M.G.); Tel.: +86-027-87700850

† These authors contributed equally to this work.

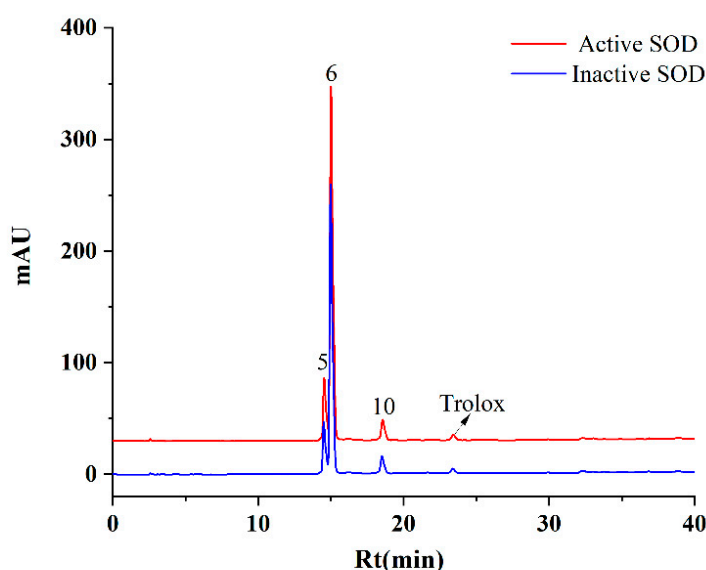

**Figure S1.** The UF-LC-UV chromatograms of the potential ligands of superoxide dismutase (SOD) at 280 nm. The red and blue line represent activated and inactivated SOD, respectively. (5, *N-trans-p*-coumaroyloctopamine; 6, *N-trans-feruloyloctopamine*; 10, *N-trans-feruloyltyramine*).

**Table S1.** The relative binding degree (BD) and the relative IC<sub>50</sub> data of potential SOD ligands in *P. sibiricum*.

| NO. | Compound                              | BD (%) | Relative IC <sub>50</sub> (mM) |
|-----|---------------------------------------|--------|--------------------------------|
| 5   | <i>N-trans-p</i> -coumaroyloctopamine | 19.10  | 2.06                           |
| 6   | <i>N-trans-feruloyloctopamine</i>     | 21.70  | 1.81                           |
| 10  | <i>N-trans-feruloyltyramine</i>       | 25.80  | 1.52                           |
| -   | Trolox                                | 13.98  | 2.82                           |

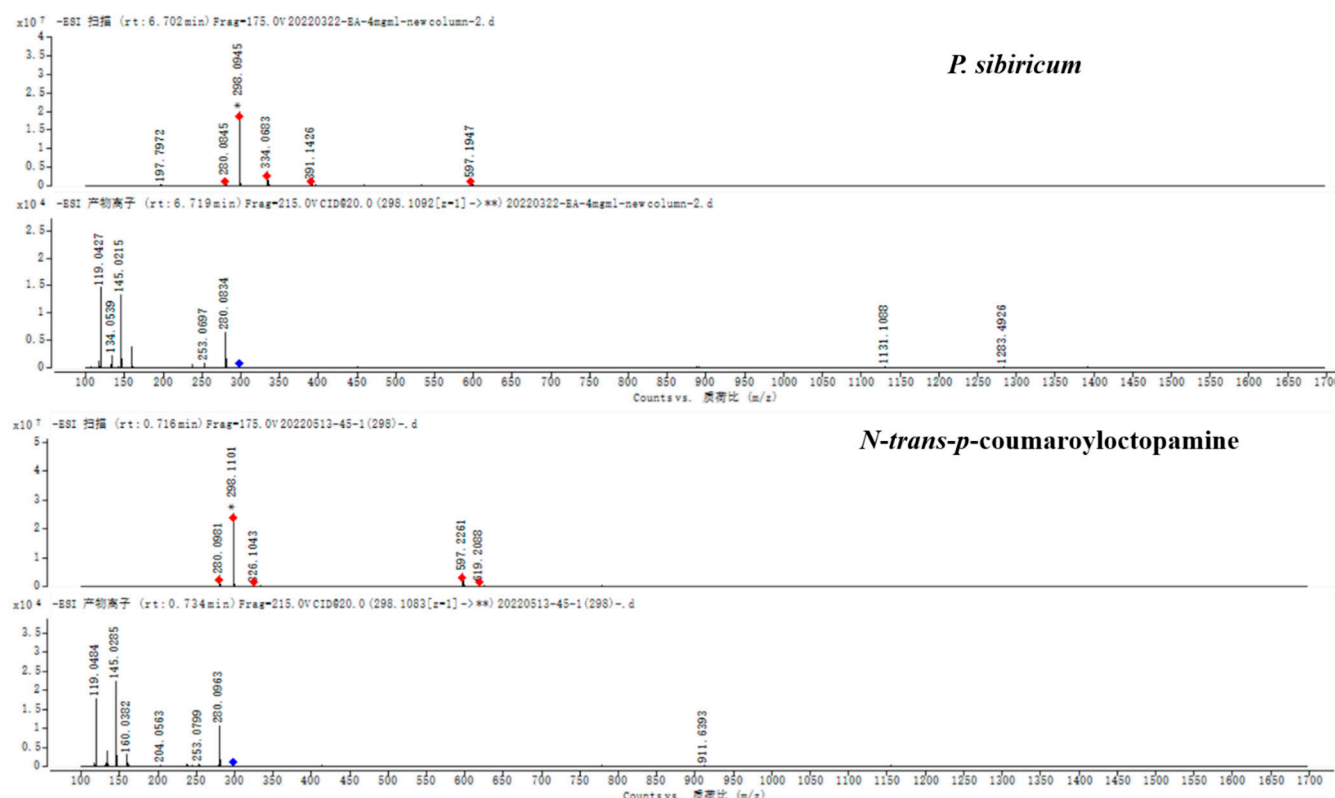

**Figure S2.** The mass spectrometry fragments of *N-trans-p-coumaroyloctopamine* in standard substance and *P. sibiricum*.

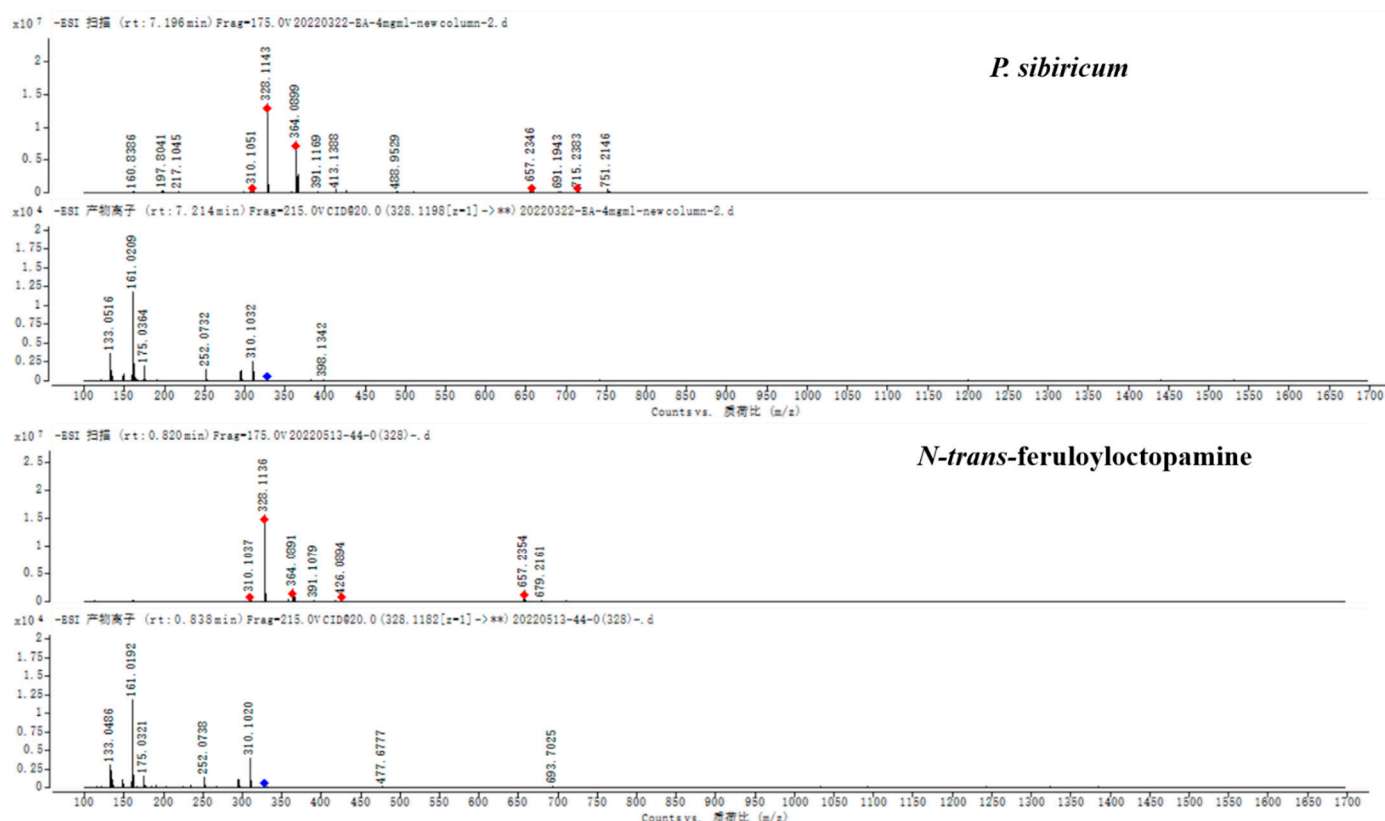

**Figure S3.** The mass spectrometry fragments of *N-trans-feruloyloctopamine* in standard substance and *P. sibiricum*.

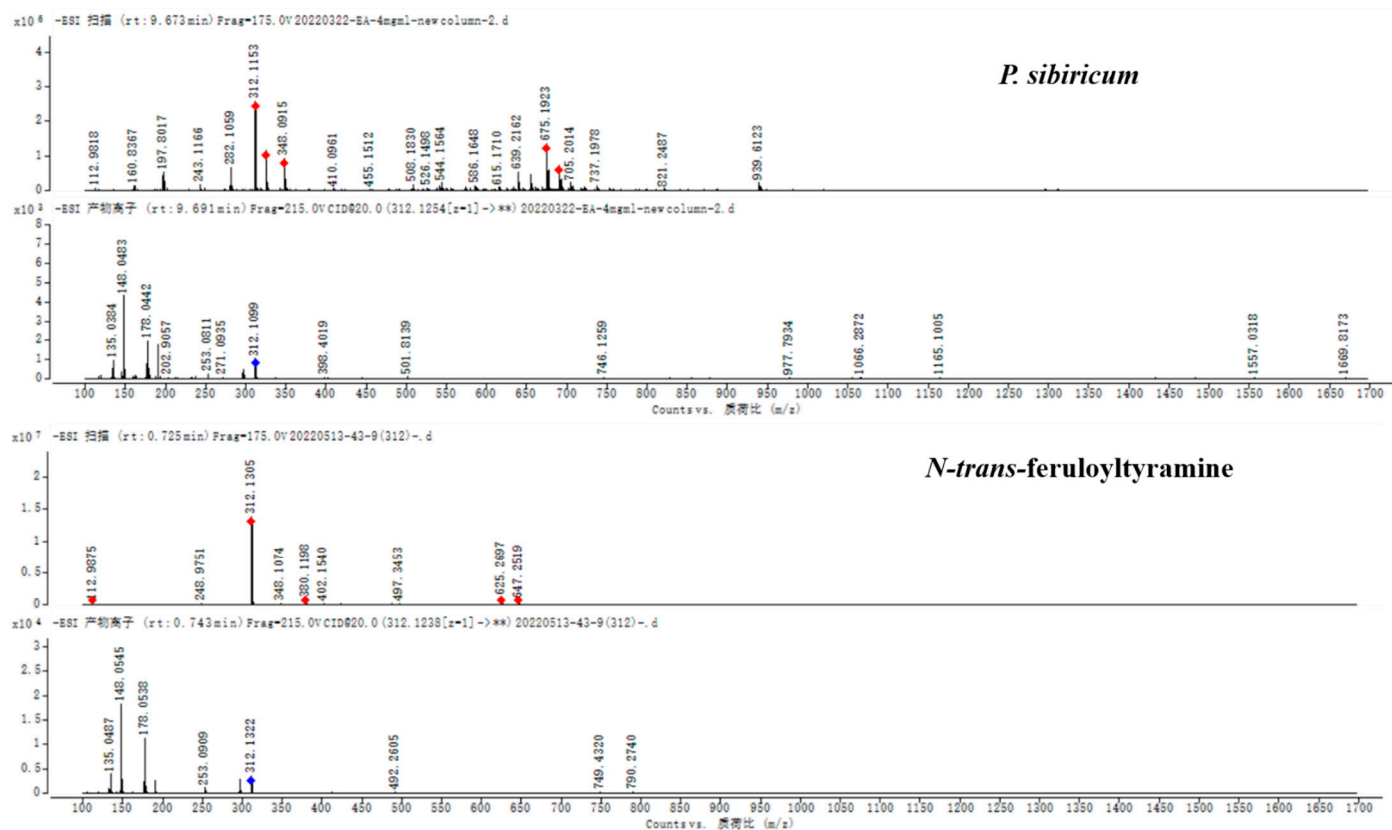

**Figure S4.** The mass spectrometry fragments of *N-trans-feruloyltyramine* in standard substance and *P. sibiricum*.

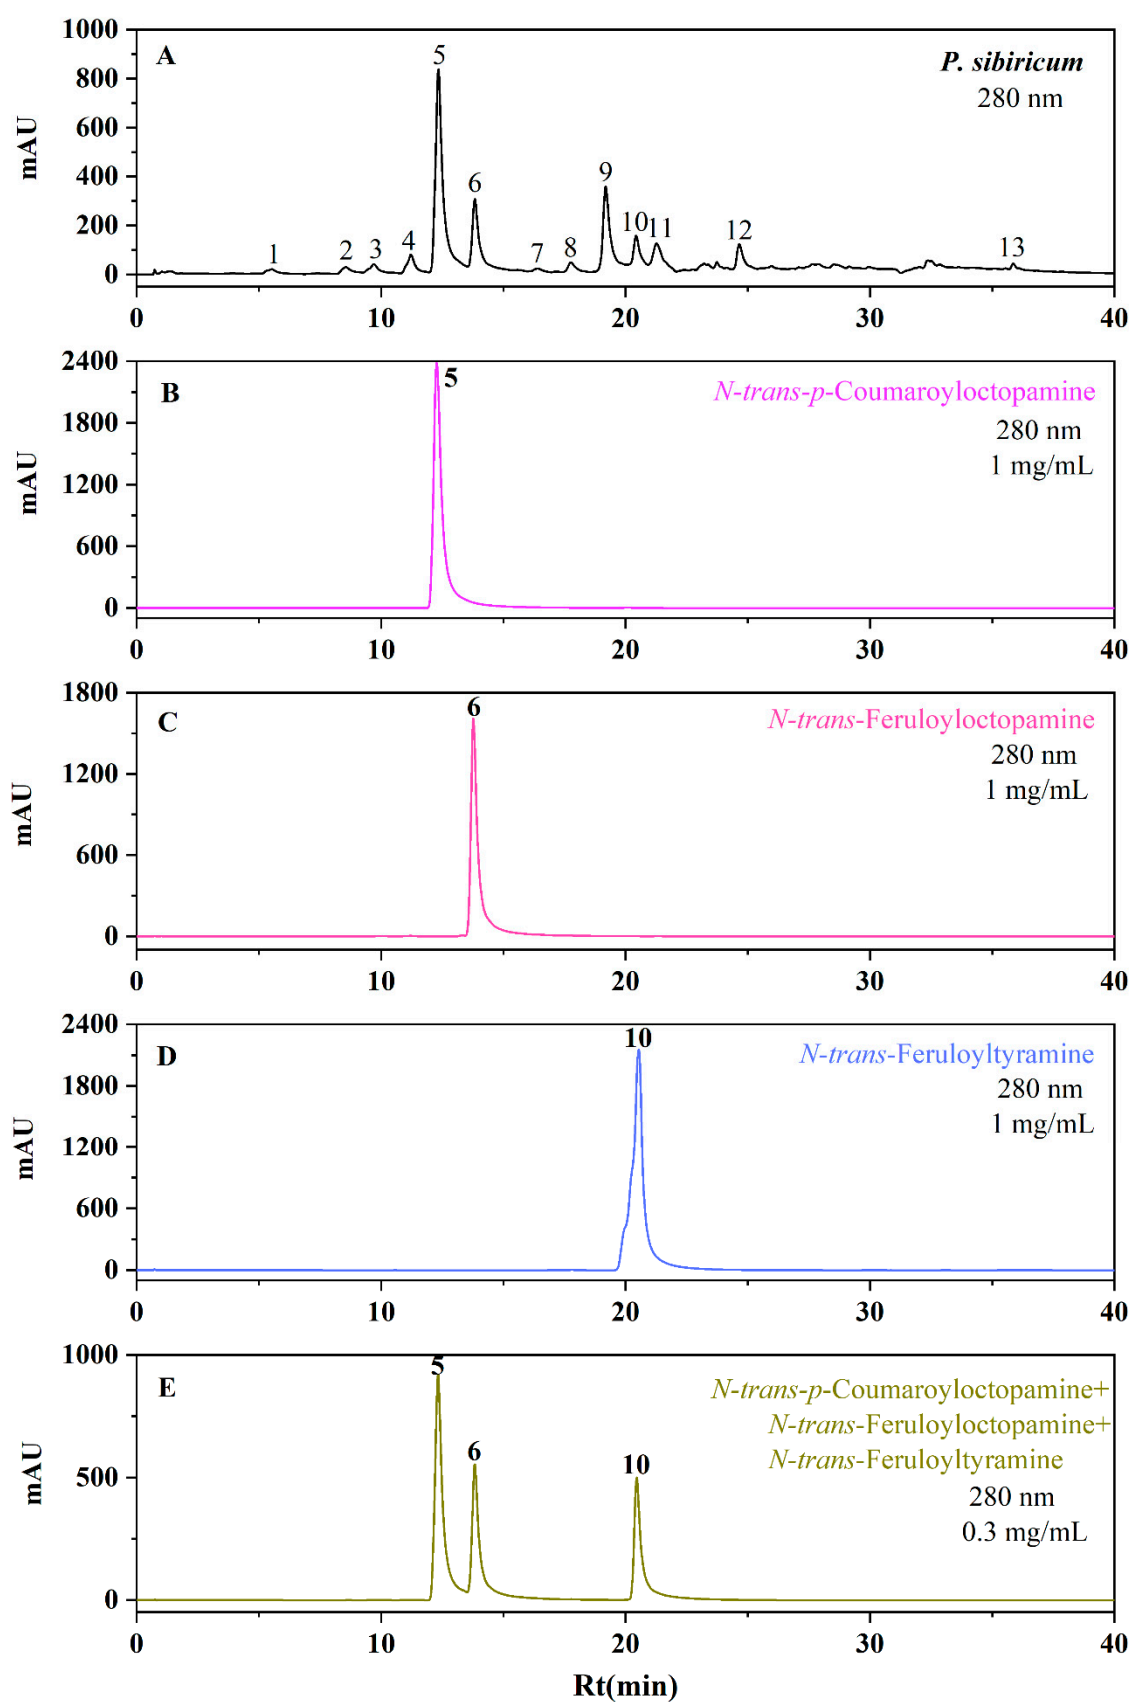

**Figure S5.** The UPLC of the potential ligands' standards to SOD. A: *P. sibiricum*; B: *N-trans-p-coumaroyloctopamine*; C: *N-trans-feruloyloctopamine*; D: *N-trans-feruloyltyramine*; E: *N-trans-p-coumaroyloctopamine* + *N-trans-feruloyloctopamine* + *N-trans-feruloyltyramine*.
